# Supplementary material for: Statistical parametrization of cell cytoskeleton reveals lung cancer cytoskeletal phenotype with partial EMT signature
Source: PubMed Central journal article supplement (PMC9061773; doi:10.1038/s42003-022-03358-0), 2022-05-02
Supplement: 42003_2022_3358_MOESM3_ESM.pdf [file 42003_2022_3358_MOESM3_ESM.pdf]

## Description of Additional Supplementary Files

**File name:** Supplementary Video 1

**Description:** **Tracking phenotypic transition of a single cell.** (Left panel) Fluorescence images of a single A549 cell stained with SiR-Actin at the specified time-points after addition of TGF $\beta$ 1 addition. (Right panel) OOP values extracted from the corresponding fluorescence image in the left panel.

**File name:** Supplementary Data 1

**Description:** Individual data points used to generate the figures in the main manuscript.
